# Supplementary material for: Sedimentary archaeal amoA gene abundance reflects historic nutrient level and salinity fluctuations in Qinghai Lake, Tibetan Plateau
Source: PubMed Central journal article supplement (PMC4678299; doi:10.1038/srep18071), 2015-12-15
Supplement: srep18071-s1.pdf [file srep18071-s1.pdf]

# **Sedimentary archaeal *amoA* gene abundance reflects historic nutrient level and salinity fluctuations in Qinghai Lake, Tibetan Plateau**

*Running title: AEA amoA gene reflects paleo-environmental conditions*

Jian Yang<sup>1</sup>, Hongchen Jiang<sup>1\*</sup>, Hailiang Dong<sup>2,3\*</sup>, Weiguo Hou<sup>2</sup>, Gaoyuan Li<sup>2</sup>, and Geng Wu<sup>1</sup>

<sup>1</sup>*State Key Laboratory of Biogeology and Environmental Geology, China University of Geosciences, Wuhan, 430074, China*

<sup>2</sup>*State Key Laboratory of Biogeology and Environmental Geology, China University of Geosciences, Beijing, 100083, China*

<sup>3</sup>*Department of Geology and Environmental Earth Science, Miami University, Oxford, OH45056, USA*

\*Corresponding authors:

Hongchen Jiang: [jiangh@cug.edu.cn](mailto:jiangh@cug.edu.cn); Tel: 86-27-67883061

Hailiang Dong: [dongh@cugb.edu.cn](mailto:dongh@cugb.edu.cn); [dongh@miamioh.edu](mailto:dongh@miamioh.edu)

## **Author contributions**

J.Y., H.J. and H.D. conceived and designed the experiments; J.Y., W.H., G.L. and G.W. analyzed the data. All of the authors assisted in writing the manuscript, discussed the results and commented on the manuscript.

## **Additional information**

Competing financial interests: The authors declare no competing financial interests.

## **Caption for Supplementary Figures**

**Fig. S1** Age - depth model of the studied core.

**Fig.S2** Linear correlation between thaumarchaeotal 16S rRNA and archaeal *amoA* gene abundance  
in the Qinghai Lake core.

**Fig. S3** Distribution of dominant OTU types plotted against TOC content.

**Fig. S4** Rarefaction curves of *amoA* gene libraries derived from this study.

**Fig. S1** Age - depth model of the studied core.

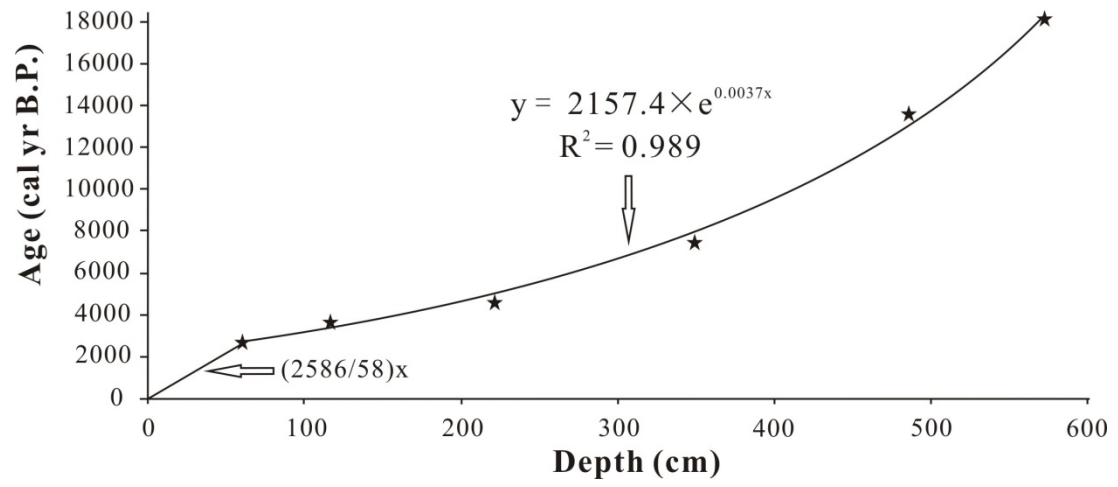

**Fig.S2** Linear correlation between thaumarchaeotal 16S rRNA and archaeal *amoA* gene abundance

in the Qinghai Lake core.

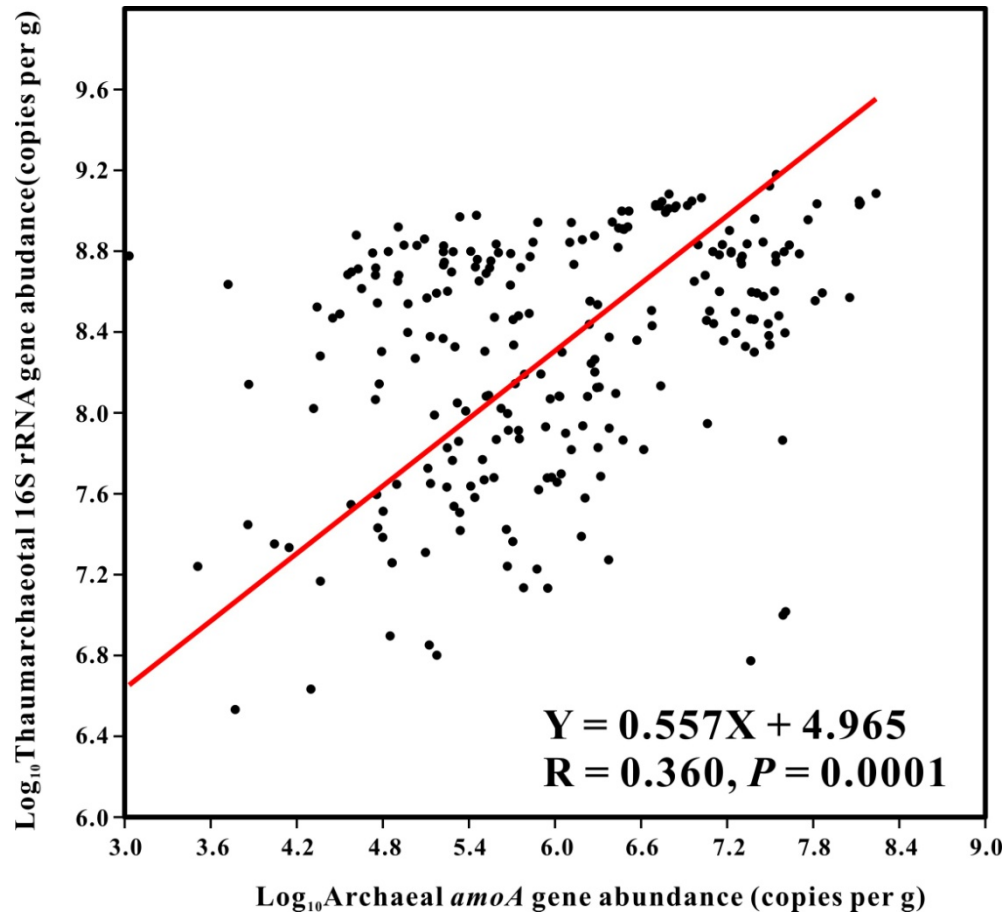

**Fig. S3** Distribution of dominant OTU types plotted against TOC content.

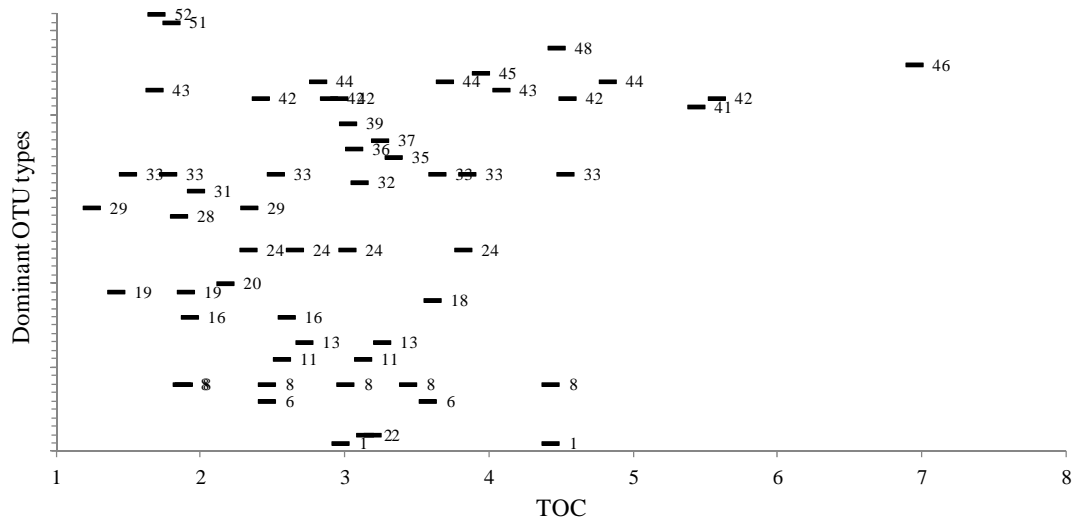

**Fig. S4** Rarefaction curves of *amoA* gene libraries derived from this study.

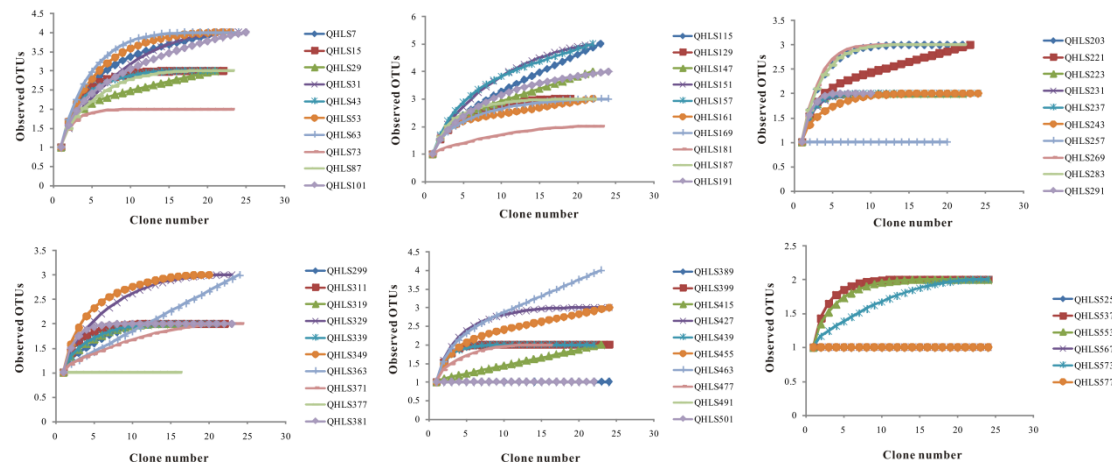

**Table S1** Age, TOC contents, Pore water conductivities, Crenarchaeal 16S rRNA gene, raw *amoA* and adjusted *amoA* gene abundances of the sediment subsamples in the studied Qinghai Lake core.

| Sample IDs | Kal. Age (Year BP) | Conductivity (ms/cm) | TOC(%) | <i>amoA</i> gene abundance (copies per g sediment) | SD       | Adjusted <i>amoA</i> gene abundance (copies per g sediment) | Thaumarchaeotal 16S rRNA gene abundance (copies per g sediment) | SD (copies per g sediment) |
|------------|--------------------|----------------------|--------|----------------------------------------------------|----------|-------------------------------------------------------------|-----------------------------------------------------------------|----------------------------|
| QHLS001    | 44.6               | 13.5                 | 2.5    | 5.36E+06                                           | 4.53E+04 | 5.41E+06                                                    | 1.06E+09                                                        | 1.91E+07                   |
| QHLS003    | 133.8              | nm                   | 2.6    | no dna                                             | no dna   | no dna                                                      | no dna                                                          | no dna                     |
| QHLS005    | 222.9              | 13.3                 | 2.8    | 3.27E+06                                           | 4.87E+04 | 3.43E+06                                                    | 9.96E+08                                                        | 8.82E+06                   |
| QHLS007    | 312.1              | 11.8                 | 3.1    | 1.97E+07                                           | 2.09E+06 | 2.10E+07                                                    | 5.71E+08                                                        | 4.05E+07                   |
| QHLS009    | 401.3              | 13.1                 | 4.2    | 1.47E+07                                           | 4.84E+05 | 1.59E+07                                                    | 6.80E+08                                                        | 1.23E+08                   |
| QHLS011    | 490.4              | 12.2                 | 2.6    | 9.94E+06                                           | 1.19E+05 | 1.10E+07                                                    | 6.79E+08                                                        | 2.56E+07                   |
| QHLS013    | 579.6              | 13.1                 | 2.7    | 8.37E+06                                           | 5.91E+05 | 9.44E+06                                                    | 1.06E+09                                                        | 4.95E+07                   |
| QHLS015    | 668.8              | 13.0                 | 3.2    | 2.18E+07                                           | 1.53E+06 | 2.50E+07                                                    | 6.85E+08                                                        | 8.47E+07                   |
| QHLS017    | 758.0              | 13.3                 | 2.8    | 6.17E+06                                           | 2.01E+05 | 7.21E+06                                                    | 1.02E+09                                                        | 1.85E+06                   |
| QHLS019    | 847.1              | 12.4                 | 2.8    | 6.98E+06                                           | 9.73E+04 | 8.32E+06                                                    | 1.06E+09                                                        | 2.77E+07                   |
| QHLS021    | 936.3              | nm                   | 2.8    | 1.69E+07                                           | 2.41E+05 | 2.05E+07                                                    | 6.19E+08                                                        | 6.10E+07                   |
| QHLS023    | 1025.5             | 13.2                 | 2.1    | 1.05E+07                                           | 4.56E+05 | 1.30E+07                                                    | 1.16E+09                                                        | 9.93E+06                   |
| QHLS025    | 1114.7             | nm                   | nm     | 8.97E+06                                           | 1.96E+06 | 1.13E+07                                                    | 1.12E+09                                                        | 4.55E+07                   |
| QHLS027    | 1203.8             | 13.4                 | 2.7    | 1.40E+07                                           | 2.19E+06 | 1.79E+07                                                    | 6.05E+08                                                        | 3.77E+07                   |
| QHLS029    | 1293.0             | 13.0                 | 2.5    | 1.26E+07                                           | 1.17E+06 | 1.64E+07                                                    | 6.28E+08                                                        | 3.17E+07                   |
| QHLS031    | 1382.2             | 12.9                 | 2.5    | 1.73E+08                                           | 5.03E+06 | 2.30E+08                                                    | 1.22E+09                                                        | 1.13E+08                   |
| QHLS033    | 1471.3             | 11.7                 | nm     | 6.82E+06                                           | 1.68E+05 | 9.24E+06                                                    | 1.03E+09                                                        | 7.25E+06                   |
| QHLS035    | 1560.5             | 11.1                 | 2.3    | 3.13E+07                                           | 6.04E+05 | 4.32E+07                                                    | 1.33E+09                                                        | 3.75E+07                   |
| QHLS037    | 1649.7             | 10.9                 | 3.4    | 6.70E+07                                           | 3.68E+06 | 9.42E+07                                                    | 1.08E+09                                                        | 5.18E+07                   |
| QHLS039    | 1738.9             | 10.8                 | 3.5    | 1.32E+08                                           | 2.44E+06 | 1.89E+08                                                    | 1.12E+09                                                        | 3.38E+07                   |
| QHLS041    | 1828.0             | 10.7                 | 2.4    | 5.89E+06                                           | 6.10E+06 | 8.59E+06                                                    | 9.81E+08                                                        | 6.00E+08                   |
| QHLS043    | 1917.2             | 10.7                 | 3.1    | 1.64E+07                                           | 1.04E+06 | 2.44E+07                                                    | 7.98E+08                                                        | 1.74E+07                   |
| QHLS045    | 2006.4             | 10.3                 | 3.2    | 2.47E+07                                           | 7.06E+05 | 3.74E+07                                                    | 9.11E+08                                                        | 3.94E+07                   |
| QHLS047    | 2095.6             | 11.3                 | 2.8    | 1.69E+07                                           | 2.42E+05 | 2.60E+07                                                    | 6.28E+08                                                        | 9.37E+06                   |

|         |        |      |     |          |          |          |          |          |
|---------|--------|------|-----|----------|----------|----------|----------|----------|
| QHLS049 | 2184.7 | 11.1 | 3.0 | 7.02E+05 | 4.68E+05 | 1.10E+06 | 6.99E+08 | 2.94E+08 |
| QHLS051 | 2273.9 | 11.1 | 3.7 | 6.23E+06 | 3.35E+04 | 9.97E+06 | 1.21E+09 | 7.52E+06 |
| QHLS053 | 2363.1 | 9.7  | 2.7 | 1.34E+08 | 1.67E+06 | 2.19E+08 | 1.09E+09 | 4.19E+07 |
| QHLS055 | 2452.2 | 11.0 | 1.9 | 5.02E+06 | 4.08E+05 | 8.33E+06 | 1.05E+09 | 1.78E+07 |
| QHLS057 | 2541.4 | 10.0 | 3.2 | 4.30E+07 | 2.83E+06 | 7.26E+07 | 6.77E+08 | 5.42E+06 |
| QHLS059 | 2683.7 | 4.7  | 3.1 | no dna   | no dna   | no dna   | no dna   | no dna   |
| QHLS061 | 2703.7 | 9.8  | 1.9 | 5.55E+06 | 3.86E+05 | 9.74E+06 | 1.11E+09 | 2.81E+07 |
| QHLS063 | 2723.7 | 9.9  | 2.6 | 3.95E+07 | 8.70E+05 | 7.06E+07 | 6.27E+08 | 4.14E+07 |
| QHLS065 | 2744.0 | 10.0 | nm  | no dna   | no dna   | no dna   | no dna   | no dna   |
| QHLS067 | 2764.3 | 9.8  | 2.8 | 2.82E+07 | 4.26E+05 | 5.23E+07 | 7.00E+08 | 1.33E+07 |
| QHLS069 | 2784.9 | 7.3  | 3.9 | 1.99E+07 | 4.47E+05 | 3.77E+07 | 5.46E+08 | 1.16E+08 |
| QHLS071 | 2805.6 | 10.3 | nm  | no dna   | no dna   | no dna   | no dna   | no dna   |
| QHLS073 | 2826.4 | 10.8 | 3.6 | 1.14E+07 | 2.03E+06 | 2.23E+07 | 2.87E+08 | 5.21E+07 |
| QHLS075 | 2847.4 | 9.8  | 2.9 | 3.39E+07 | 1.64E+06 | 6.76E+07 | 4.00E+08 | 7.81E+07 |
| QHLS077 | 2868.5 | 10.2 | nm  | no dna   | no dna   | no dna   | no dna   | no dna   |
| QHLS079 | 2889.8 | 9.8  | 2.4 | 7.28E+07 | 3.85E+06 | 1.51E+08 | 3.93E+08 | 6.74E+07 |
| QHLS081 | 2911.3 | 9.7  | nm  | no dna   | no dna   | no dna   | no dna   | no dna   |
| QHLS083 | 2932.9 | 11.5 | 3.3 | 3.45E+07 | 2.08E+06 | 7.42E+07 | 6.00E+08 | 1.76E+08 |
| QHLS085 | 2954.7 | nm   | nm  | no dna   | no dna   | no dna   | no dna   | no dna   |
| QHLS087 | 2976.7 | 8.1  | 2.2 | 5.04E+07 | 1.13E+07 | 1.12E+08 | 6.13E+08 | 1.35E+07 |
| QHLS089 | 2998.8 | 10.0 | 3.0 | no dna   | no dna   | no dna   | no dna   | no dna   |
| QHLS091 | 3021.0 | 9.0  | 2.3 | 2.02E+07 | 8.97E+04 | 4.67E+07 | 5.96E+08 | 9.61E+06 |
| QHLS093 | 3043.5 | 9.2  | nm  | no dna   | no dna   | no dna   | no dna   | no dna   |
| QHLS095 | 3066.1 | 8.9  | 2.3 | 9.34E+06 | 6.51E+05 | 2.24E+07 | 4.47E+08 | 7.28E+07 |
| QHLS097 | 3088.9 | 7.2  | 2.5 | 1.81E+07 | 1.74E+06 | 4.42E+07 | 3.16E+08 | 1.50E+08 |
| QHLS099 | 3111.8 | 9.3  | 1.3 | no dna   | no dna   | no dna   | no dna   | no dna   |
| QHLS101 | 3134.9 | 8.7  | 2.6 | 5.45E+06 | 2.63E+04 | 1.38E+07 | 1.36E+08 | 1.47E+07 |
| QHLS103 | 3158.2 | 9.4  | 2.4 | 1.20E+07 | 5.32E+05 | 3.09E+07 | 3.19E+08 | 1.06E+08 |
| QHLS105 | 3181.7 | 8.9  | 1.8 | no dna   | no dna   | no dna   | no dna   | no dna   |
| QHLS107 | 3205.3 | 8.8  | 2.4 | 1.11E+07 | 2.46E+06 | 2.98E+07 | 4.79E+08 | 2.72E+07 |



|         |        |     |     |          |          |          |          |          |
|---------|--------|-----|-----|----------|----------|----------|----------|----------|
| QHLS109 | 3229.1 | 8.3 | 1.9 | no dna   | no dna   | no dna   | no dna   | no dna   |
| QHLS111 | 3253.1 | 8.1 | 2.6 | 1.40E+07 | 1.57E+06 | 3.89E+07 | 3.99E+08 | 4.43E+07 |
| QHLS113 | 3277.2 | 8.8 | 2.1 | no dna   | no dna   | no dna   | no dna   | no dna   |
| QHLS115 | 3301.6 | 8.4 | 2.3 | 1.15E+07 | 5.11E+05 | 3.32E+07 | 8.86E+07 | 6.01E+07 |
| QHLS117 | 3326.1 | 8.7 | 1.5 | no dna   | no dna   | no dna   | no dna   | no dna   |
| QHLS119 | 3350.8 | 8.4 | 2.6 | 3.15E+07 | 1.48E+07 | 9.42E+07 | 2.17E+08 | 2.69E+07 |
| QHLS121 | 3375.7 | 9.0 | 2.3 | 2.45E+07 | 2.13E+06 | 7.46E+07 | 2.00E+08 | 5.77E+06 |
| QHLS123 | 3400.8 | 9.2 | 1.4 | no dna   | no dna   | no dna   | no dna   | no dna   |
| QHLS125 | 3426.0 | 8.5 | 2.3 | 3.09E+07 | 1.28E+07 | 9.78E+07 | 2.41E+08 | 2.21E+07 |
| QHLS127 | 3451.5 | 9.4 | 1.0 | no dna   | no dna   | no dna   | no dna   | no dna   |
| QHLS129 | 3477.1 | 9.6 | 1.8 | 4.01E+07 | 3.81E+06 | 1.32E+08 | 2.49E+08 | 1.18E+07 |
| QHLS131 | 3502.9 | 9.2 | 2.5 | 3.63E+07 | 7.55E+05 | 1.21E+08 | 3.02E+08 | 5.98E+07 |
| QHLS133 | 3529.0 | 8.7 | nm  | no dna   | no dna   | no dna   | no dna   | no dna   |
| QHLS135 | 3555.2 | 8.4 | 2.1 | 2.31E+07 | 3.09E+06 | 8.01E+07 | 5.94E+06 | 2.06E+07 |
| QHLS137 | 3581.6 | 7.4 | 2.3 | 2.12E+07 | 1.11E+06 | 7.50E+07 | 2.13E+08 | 2.73E+07 |
| QHLS139 | 3608.2 | 8.2 | 2.8 | 2.84E+07 | 6.02E+06 | 1.02E+08 | 3.77E+08 | 3.90E+07 |
| QHLS141 | 3635.0 | 8.2 | 2.7 | 2.75E+06 | 4.89E+05 | 1.01E+07 | 6.59E+08 | 5.39E+07 |
| QHLS143 | 3662.0 | 7.7 | 2.5 | 1.82E+07 | 2.68E+06 | 6.79E+07 | 2.48E+08 | 6.08E+07 |
| QHLS145 | 3689.2 | 7.1 | 2.1 | 4.05E+07 | 2.08E+06 | 1.54E+08 | 1.04E+07 | 3.96E+07 |
| QHLS147 | 3716.6 | 7.7 | 2.3 | 2.34E+07 | 1.83E+06 | 9.07E+07 | 3.96E+08 | 1.00E+07 |
| QHLS149 | 3744.2 | nm  | 2.1 | 3.88E+07 | 9.76E+06 | 1.53E+08 | 9.98E+06 | 3.94E+07 |
| QHLS151 | 3772.0 | 7.8 | 2.0 | 6.50E+07 | 3.30E+06 | 2.61E+08 | 3.59E+08 | 8.06E+07 |
| QHLS153 | 3800.0 | 8.3 | 2.3 | 1.13E+08 | 1.92E+07 | 4.63E+08 | 3.72E+08 | 6.95E+07 |
| QHLS155 | 3828.2 | 8.1 | 2.4 | 8.06E+04 | 1.94E+04 | 3.36E+05 | 8.31E+08 | 5.01E+07 |
| QHLS157 | 3856.7 | 7.8 | 2.5 | 1.89E+06 | 8.52E+05 | 8.04E+06 | 1.84E+08 | 1.25E+07 |
| QHLS159 | 3885.3 | 7.4 | 2.6 | 2.77E+06 | 4.06E+05 | 1.20E+07 | 8.21E+08 | 9.41E+06 |
| QHLS161 | 3914.2 | 8.4 | 3.3 | 1.27E+07 | 1.67E+06 | 5.61E+07 | 2.77E+08 | 3.99E+07 |
| QHLS163 | 3943.2 | 8.0 | nm  | no dna   | no dna   | no dna   | no dna   | no dna   |
| QHLS165 | 3972.5 | 8.0 | 3.6 | 1.95E+06 | 7.30E+05 | 8.93E+06 | 1.33E+08 | 5.45E+07 |
| QHLS167 | 4002.0 | 8.4 | 3.0 | 6.87E+04 | 1.47E+04 | 3.20E+05 | 6.28E+08 | 1.93E+07 |

|         |        |      |     |          |          |          |          |          |
|---------|--------|------|-----|----------|----------|----------|----------|----------|
| QHLS169 | 4031.8 | 9.0  | 3.0 | 1.98E+06 | 5.66E+05 | 9.38E+06 | 3.43E+08 | 1.24E+07 |
| QHLS171 | 4061.7 | 9.0  | nm  | 3.59E+04 | 1.40E+04 | 1.74E+05 | 4.83E+08 | 3.43E+07 |
| QHLS173 | 4091.9 | 8.9  | 3.2 | 1.75E+06 | 5.10E+05 | 8.62E+06 | 3.57E+08 | 2.50E+07 |
| QHLS175 | 4122.3 | 9.0  | 4.0 | 2.03E+06 | 2.17E+04 | 1.02E+07 | 1.34E+08 | 4.56E+07 |
| QHLS177 | 4152.9 | 9.1  | 4.4 | no dna   | no dna   | no dna   | no dna   | no dna   |
| QHLS179 | 4183.7 | 8.9  | 2.0 | 1.07E+03 | 8.28E+02 | 5.58E+03 | 5.98E+08 | 8.58E+06 |
| QHLS181 | 4214.8 | 9.1  | 3.6 | 1.30E+06 | 2.98E+05 | 6.87E+06 | 6.58E+07 | 1.59E+06 |
| QHLS183 | 4246.1 | nm   | 2.3 | 5.02E+06 | 9.75E+05 | 2.71E+07 | 1.07E+09 | 5.38E+07 |
| QHLS185 | 4277.6 | 9.4  | 3.0 | 1.67E+05 | 3.27E+04 | 9.18E+05 | 5.39E+08 | 6.45E+06 |
| QHLS187 | 4309.4 | 10.7 | 3.8 | 3.06E+07 | 1.47E+07 | 1.71E+08 | 2.76E+08 | 4.26E+07 |
| QHLS189 | 4341.4 | 9.2  | 3.6 | 5.26E+03 | 6.62E+03 | 3.00E+04 | 4.32E+08 | 2.93E+07 |
| QHLS191 | 4373.7 | 9.5  | 3.3 | 3.03E+06 | 3.09E+05 | 1.76E+07 | 8.09E+08 | 5.85E+06 |
| QHLS193 | 4406.2 | 10.1 | 1.8 | 2.87E+05 | 6.70E+04 | 1.70E+06 | 5.74E+08 | 1.99E+07 |
| QHLS195 | 4438.9 | 9.4  | 3.5 | 3.72E+06 | 6.67E+05 | 2.24E+07 | 2.29E+08 | 5.49E+07 |
| QHLS197 | 4471.9 | 8.3  | 2.7 | 4.71E+06 | 5.22E+05 | 2.89E+07 | 3.21E+08 | 9.50E+07 |
| QHLS199 | 4505.1 | 8.7  | 2.1 | 3.47E+07 | 2.60E+06 | 2.17E+08 | 5.59E+08 | 1.37E+08 |
| QHLS201 | 4538.5 | 8.3  | nm  | 1.27E+06 | 9.32E+05 | 8.06E+06 | 6.98E+08 | 1.96E+08 |
| QHLS203 | 4572.2 | 7.8  | 2.6 | 1.32E+08 | 5.87E+07 | 8.58E+08 | 1.07E+09 | 2.60E+08 |
| QHLS205 | 4606.2 | 8.5  | 2.0 | 3.49E+07 | 4.72E+06 | 2.30E+08 | 1.51E+09 | 1.96E+07 |
| QHLS207 | 4640.4 | 9.2  | 2.7 | 5.80E+07 | 6.72E+06 | 3.90E+08 | 9.03E+08 | 1.47E+08 |
| QHLS209 | 4674.9 | 8.6  | 3.3 | 1.95E+05 | 2.72E+04 | 1.33E+06 | 6.27E+08 | 4.61E+07 |
| QHLS211 | 4709.6 | 9.4  | 2.3 | 2.30E+07 | 1.17E+06 | 1.61E+08 | 2.91E+08 | 6.60E+07 |
| QHLS213 | 4744.6 | 8.3  | 3.5 | 1.88E+06 | 1.94E+05 | 1.34E+07 | 7.53E+08 | 2.38E+07 |
| QHLS215 | 4779.8 | 8.4  | 2.6 | 2.96E+06 | 5.26E+04 | 2.14E+07 | 8.14E+08 | 4.63E+07 |
| QHLS217 | 4815.3 | 8.7  | 3.0 | 2.98E+06 | 5.23E+05 | 2.20E+07 | 7.34E+07 | 2.02E+07 |
| QHLS219 | 4851.1 | 8.2  | 2.2 | 3.50E+05 | 1.09E+04 | 2.63E+06 | 5.21E+08 | 3.50E+07 |
| QHLS221 | 4887.1 | 8.1  | 3.2 | 2.65E+06 | 3.58E+05 | 2.03E+07 | 1.25E+08 | 5.77E+07 |
| QHLS223 | 4923.4 | 8.1  | 3.0 | 2.56E+07 | 2.15E+06 | 1.99E+08 | 3.92E+08 | 1.19E+07 |
| QHLS225 | 4960.0 | 6.9  | nm  | 2.51E+06 | 1.68E+05 | 1.99E+07 | 8.80E+08 | 9.75E+06 |
| QHLS227 | 4996.8 | 8.2  | 5.0 | 4.75E+06 | 9.57E+05 | 3.84E+07 | 2.70E+08 | 1.60E+07 |

|         |        |      |     |          |          |          |          |          |
|---------|--------|------|-----|----------|----------|----------|----------|----------|
| QHLS229 | 5033.9 | nm   | 3.5 | 1.30E+06 | 1.23E+05 | 1.07E+07 | 8.75E+08 | 2.84E+07 |
| QHLS231 | 5071.3 | 10.9 | 5.4 | 4.89E+05 | 1.57E+03 | 4.10E+06 | 4.28E+08 | 7.88E+07 |
| QHLS233 | 5109.0 | 8.3  | 3.9 | 1.18E+06 | 5.77E+05 | 1.01E+07 | 7.94E+07 | 4.35E+06 |
| QHLS235 | 5146.9 | 7.8  | 4.0 | 1.56E+06 | 5.08E+05 | 1.36E+07 | 8.63E+07 | 1.30E+06 |
| QHLS237 | 5185.2 | 7.3  | 3.0 | 3.85E+07 | 5.23E+06 | 3.42E+08 | 7.33E+07 | 1.93E+06 |
| QHLS239 | 5223.7 | 7.6  | 1.2 | 3.21E+06 | 1.32E+05 | 2.90E+07 | 8.33E+08 | 7.33E+06 |
| QHLS241 | 5262.5 | 7.5  | 3.4 | 2.08E+06 | 7.73E+04 | 1.92E+07 | 4.86E+07 | 1.06E+07 |
| QHLS243 | 5301.6 | 7.6  | 3.4 | 1.10E+06 | 5.68E+05 | 1.03E+07 | 5.00E+07 | 2.14E+06 |
| QHLS245 | 5341.0 | 7.4  | nm  | 1.55E+06 | 8.86E+04 | 1.48E+07 | 7.19E+08 | 3.46E+07 |
| QHLS247 | 5380.6 | 7.4  | 2.6 | 1.99E+06 | 5.30E+05 | 1.94E+07 | 6.74E+07 | 1.60E+06 |
| QHLS249 | 5420.6 | 7.5  | 2.3 | 8.59E+05 | 3.95E+05 | 8.51E+06 | 8.54E+07 | 1.52E+07 |
| QHLS251 | 5460.8 | 7.7  | nm  | no dna   | no dna   | no dna   | no dna   | no dna   |
| QHLS253 | 5501.4 | 7.5  | 3.8 | 5.63E+05 | 1.60E+05 | 5.79E+06 | 7.45E+07 | 4.58E+06 |
| QHLS255 | 5542.3 | 7.5  | 1.2 | 2.13E+05 | 3.10E+04 | 2.23E+06 | 7.23E+07 | 2.82E+07 |
| QHLS257 | 5583.4 | 7.7  | 1.9 | 1.50E+05 | 2.30E+07 | 1.60E+06 | 6.33E+06 |          |
| QHLS259 | 5624.9 | 8.9  | 2.1 | 8.15E+04 | 4.31E+04 | 8.85E+05 | 4.80E+08 | 5.62E+06 |
| QHLS261 | 5666.7 | 8.6  | 2.9 | 8.82E+05 | 1.07E+05 | 9.76E+06 | 4.77E+07 | 5.42E+06 |
| QHLS263 | 5708.8 | 8.5  | 3.3 | 4.73E+05 | 6.91E+04 | 5.33E+06 | 8.20E+07 | 9.74E+06 |
| QHLS265 | 5751.2 | 8.2  | 2.5 | 1.09E+05 | 1.12E+04 | 1.25E+06 | 6.73E+08 | 1.21E+07 |
| QHLS267 | 5793.9 | 7.6  | 2.6 | 2.83E+05 | 2.82E+04 | 3.31E+06 | 9.50E+08 | 1.96E+07 |
| QHLS269 | 5836.9 | 7.1  | 3.0 | 1.44E+05 | 6.28E+03 | 1.72E+06 | 9.76E+07 | 3.14E+07 |
| QHLS271 | 5880.3 | 6.0  | 3.6 | 2.18E+05 | 5.19E+04 | 2.65E+06 | 2.62E+07 | 2.25E+06 |
| QHLS273 | 5924.0 | 7.5  | nm  | no dna   | no dna   | no dna   | no dna   | no dna   |
| QHLS275 | 5968.0 | 6.9  | 2.8 | 1.67E+05 | 5.51E+04 | 2.10E+06 | 6.27E+08 | 7.97E+06 |
| QHLS277 | 6012.3 | 7.3  | 2.6 | 2.75E+05 | 1.04E+05 | 3.53E+06 | 3.82E+07 | 1.53E+06 |
| QHLS279 | 6056.9 | 6.9  | 2.6 | 2.92E+06 | 9.41E+03 | 3.81E+07 | 9.96E+08 | 2.48E+07 |
| QHLS281 | 6101.9 | 6.5  | 2.6 | 2.38E+06 | 9.41E+05 | 3.17E+07 | 8.40E+07 | 1.87E+07 |
| QHLS283 | 6147.2 | 6.6  | 2.9 | 2.44E+07 | 6.57E+06 | 3.31E+08 | 2.90E+08 | 4.71E+07 |
| QHLS285 | 6192.9 | 6.6  | nm  | 7.59E+05 | 9.54E+04 | 1.05E+07 | 8.77E+08 | 4.92E+04 |
| QHLS287 | 6238.9 | 7.1  | 2.7 | 1.06E+06 | 1.89E+05 | 1.50E+07 | 1.21E+08 | 5.47E+07 |

|         |        |     |     |          |          |          |          |          |
|---------|--------|-----|-----|----------|----------|----------|----------|----------|
| QHLS289 | 6285.2 | nm  | 1.4 | no dna   | no dna   | no dna   | no dna   | no dna   |
| QHLS291 | 6331.9 | nm  | 4.4 | 9.25E+05 | 3.00E+04 | 1.35E+07 | 1.17E+08 | 5.34E+07 |
| QHLS293 | 6379.0 | 6.6 | 3.9 | 2.78E+05 | 9.51E+04 | 4.14E+06 | 5.27E+08 | 2.41E+07 |
| QHLS295 | 6426.3 | 6.8 | 2.7 | 4.20E+05 | 5.63E+04 | 6.36E+06 | 1.05E+08 | 1.10E+07 |
| QHLS297 | 6474.1 | 6.3 | nm  | no dna   | no dna   | no dna   | no dna   | no dna   |
| QHLS299 | 6522.1 | 6.4 | 2.8 | 1.50E+07 | 2.96E+06 | 2.35E+08 | 2.27E+08 | 1.47E+07 |
| QHLS301 | 6570.6 | 6.7 | 3.4 | 1.79E+06 | 3.37E+05 | 2.86E+07 | 1.76E+08 | 1.47E+06 |
| QHLS303 | 6619.4 | 6.7 | nm  | no dna   | no dna   | no dna   | no dna   | no dna   |
| QHLS305 | 6668.6 | nm  | nm  | no dna   | no dna   | no dna   | no dna   | no dna   |
| QHLS307 | 6718.1 | 6.7 | 2.9 | 1.73E+06 | 6.71E+05 | 2.93E+07 | 2.74E+08 | 1.61E+07 |
| QHLS309 | 6768.0 | 6.7 | 3.7 | 4.03E+05 | 1.45E+04 | 6.94E+06 | 6.20E+08 | 1.66E+07 |
| QHLS311 | 6818.3 | 7.0 | 3.6 | 3.24E+05 | 1.60E+03 | 5.68E+06 | 2.02E+08 | 4.10E+07 |
| QHLS313 | 6868.9 | 7.5 | 3.8 | 1.67E+05 | 5.41E+03 | 2.99E+06 | 6.70E+08 | 1.90E+07 |
| QHLS315 | 6919.9 | 7.1 | 5.5 | 5.28E+05 | 2.06E+05 | 9.60E+06 | 1.39E+08 | 4.84E+07 |
| QHLS317 | 6971.3 | 6.4 | 3.5 | 4.91E+05 | 6.40E+04 | 9.09E+06 | 6.14E+08 | 4.62E+06 |
| QHLS319 | 7023.1 | 6.5 | 4.1 | 1.77E+05 | 5.77E+04 | 3.35E+06 | 6.72E+07 | 2.39E+06 |
| QHLS321 | 7075.3 | 7.1 | 3.3 | 3.32E+05 | 1.06E+05 | 6.38E+06 | 1.21E+08 | 2.27E+07 |
| QHLS323 | 7127.8 | 6.3 | 3.3 | 3.88E+05 | 4.02E+05 | 7.61E+06 | 6.84E+08 | 3.39E+08 |
| QHLS325 | 7180.7 | 6.5 | 5.9 | 3.44E+05 | 2.18E+04 | 6.87E+06 | 1.22E+08 | 3.64E+07 |
| QHLS327 | 7234.1 | 6.8 | 4.7 | 6.70E+05 | 1.48E+05 | 1.36E+07 | 5.93E+08 | 2.94E+07 |
| QHLS329 | 7287.8 | nm  | 6.9 | 3.12E+05 | 1.05E+05 | 6.45E+06 | 5.88E+07 | 5.96E+06 |
| QHLS331 | 7341.9 | nm  | 4.5 | 2.17E+05 | 6.28E+04 | 4.57E+06 | 9.33E+08 | 3.99E+06 |
| QHLS333 | 7396.5 | nm  | 5.0 | 3.78E+05 | 3.24E+04 | 8.13E+06 | 2.97E+08 | 8.02E+07 |
| QHLS335 | 7451.4 | 6.2 | 3.7 | 2.59E+05 | 2.59E+04 | 5.66E+06 | 6.30E+08 | 4.69E+06 |
| QHLS337 | 7506.8 | nm  | 4.9 | 5.60E+04 | 4.28E+04 | 1.25E+06 | 1.16E+08 | 4.85E+07 |
| QHLS339 | 7562.5 | 5.8 | 4.5 | 7.97E+05 | 4.30E+04 | 1.81E+07 | 1.56E+08 | 2.80E+05 |
| QHLS341 | 7618.7 | 8.6 | 3.8 | 5.56E+05 | 1.05E+05 | 1.29E+07 | 3.02E+08 | 7.83E+07 |
| QHLS343 | 7675.3 | 7.3 | 2.3 | 3.57E+05 | 1.27E+05 | 8.40E+06 | 5.65E+08 | 4.47E+07 |
| QHLS345 | 7732.3 | 7.6 | 3.8 | 6.60E+05 | 8.08E+04 | 1.58E+07 | 3.11E+08 | 1.47E+06 |
| QHLS347 | 7789.7 | 7.0 | 3.6 | 1.78E+05 | 1.05E+05 | 4.35E+06 | 4.00E+08 | 4.71E+07 |

|         |        |     |     |          |          |          |          |          |
|---------|--------|-----|-----|----------|----------|----------|----------|----------|
| QHLS349 | 7847.6 | 6.9 | 3.1 | 1.12E+06 | 3.94E+05 | 2.78E+07 | 2.00E+08 | 1.92E+07 |
| QHLS351 | 7905.9 | 6.4 | 4.1 | no dna   | no dna   | no dna   | no dna   | no dna   |
| QHLS353 | 7964.6 | 6.4 | 7.6 | 5.10E+05 | 2.40E+05 | 1.32E+07 | 2.89E+08 | 5.91E+07 |
| QHLS355 | 8023.7 | 6.2 | 4.3 | 1.23E+05 | 4.10E+03 | 3.24E+06 | 7.25E+08 | 2.46E+07 |
| QHLS357 | 8083.3 | nm  | 6.2 | 1.35E+06 | 2.00E+05 | 3.62E+07 | 5.43E+08 | 5.35E+07 |
| QHLS359 | 8143.4 | 5.8 | 4.3 | 5.35E+04 | 1.48E+04 | 1.46E+06 | 6.18E+08 | 6.77E+07 |
| QHLS361 | 8203.9 | 4.6 | 6.2 | 3.31E+05 | 6.21E+04 | 9.20E+06 | 4.90E+08 | 2.15E+06 |
| QHLS363 | 8264.8 | nm  | 5.6 | 2.95E+05 | 9.16E+04 | 8.36E+06 | 4.49E+08 | 1.50E+08 |
| QHLS365 | 8326.2 | 6.0 | 3.5 | 8.84E+04 | 9.35E+03 | 2.55E+06 | 6.76E+08 | 1.77E+07 |
| QHLS367 | 8388.0 | 5.2 | 3.9 | 6.29E+04 | 5.10E+04 | 1.85E+06 | 2.42E+07 | 8.57E+06 |
| QHLS369 | 8450.3 | 5.8 | 3.0 | 2.82E+04 | 6.06E+03 | 8.44E+05 | 2.95E+08 | 7.78E+06 |
| QHLS371 | 8513.1 | 5.6 | 4.8 | 6.18E+04 | 9.38E+01 | 1.88E+06 | 2.01E+08 | 1.04E+07 |
| QHLS373 | 8576.3 | 5.7 | 4.5 | 2.00E+05 | 3.74E+04 | 6.22E+06 | 2.12E+08 | 8.56E+07 |
| QHLS375 | 8640.0 | 6.4 | 3.2 | no dna   | no dna   | no dna   | no dna   | no dna   |
| QHLS377 | 8704.2 | 6.2 | 4.5 | 1.11E+04 | 2.77E+03 | 3.56E+05 | 2.25E+07 | 3.18E+06 |
| QHLS379 | 8768.8 | 5.9 | 2.8 | no dna   | no dna   | no dna   | no dna   | no dna   |
| QHLS381 | 8834.0 | 6.7 | 3.7 | 3.74E+05 | 3.43E+04 | 1.25E+07 | 4.79E+07 | 1.44E+07 |
| QHLS383 | 8899.6 | 8.3 | 1.5 | no dna   | no dna   | no dna   | no dna   | no dna   |
| QHLS385 | 8965.7 | 9.6 | 3.0 | 2.08E+05 | 8.92E+04 | 7.22E+06 | 1.12E+08 | 1.12E+07 |
| QHLS387 | 9032.3 | 9.6 | nm  | no dna   | no dna   | no dna   | no dna   | no dna   |
| QHLS389 | 9099.4 | 8.3 | 2.5 | 3.23E+03 | 5.83E+02 | 1.16E+05 | 1.74E+07 | 5.42E+06 |
| QHLS391 | 9166.9 | 7.1 | 4.5 | 1.40E+04 | 6.05E+03 | 5.13E+05 | 2.16E+07 | 9.57E+05 |
| QHLS393 | 9235.0 | 6.0 | 2.2 | no dna   | no dna   | no dna   | no dna   | no dna   |
| QHLS395 | 9303.6 | 5.9 | 2.4 | 2.31E+04 | 7.14E+03 | 8.79E+05 | 1.47E+07 | 2.88E+06 |
| QHLS397 | 9372.7 | 5.2 | 4.3 | no dna   | no dna   | no dna   | no dna   | no dna   |
| QHLS399 | 9442.3 | 5.6 | 2.2 | 7.08E+04 | 2.63E+04 | 2.79E+06 | 7.89E+06 | 3.31E+06 |
| QHLS401 | 9512.5 | 6.2 | nm  | no dna   | no dna   | no dna   | no dna   | no dna   |
| QHLS403 | 9583.1 | 6.6 | 2.5 | 7.33E+03 | 4.47E+02 | 3.00E+05 | 1.39E+08 | 1.50E+06 |
| QHLS405 | 9654.3 | 5.6 | 2.8 | 5.89E+03 | 2.67E+03 | 2.46E+05 | 3.41E+06 | 1.26E+06 |
| QHLS407 | 9726.0 | 6.1 | 2.7 | 7.22E+03 | 4.55E+03 | 3.07E+05 | 2.80E+07 | 3.90E+06 |

|         |         |      |     |          |          |          |          |          |
|---------|---------|------|-----|----------|----------|----------|----------|----------|
| QHLS409 | 9798.2  | 5.9  | 2.4 | 5.94E+04 | 4.00E+04 | 2.57E+06 | 1.39E+08 | 5.01E+05 |
| QHLS411 | 9871.0  | 5.5  | 2.7 | 1.98E+04 | 1.10E+04 | 8.74E+05 | 4.30E+06 | 6.32E+05 |
| QHLS413 | 9944.3  | 5.3  | 2.1 | 2.07E+04 | 1.93E+03 | 9.30E+05 | 1.05E+08 | 6.67E+05 |
| QHLS415 | 10018.2 | 5.5  | 3.9 | 1.33E+05 | 6.66E+04 | 6.06E+06 | 7.10E+06 | 1.21E+06 |
| QHLS417 | 10092.6 | 5.3  | 4.4 | 5.81E+04 | 3.22E+03 | 2.70E+06 | 2.70E+07 | 2.67E+06 |
| QHLS419 | 10167.6 | 5.1  | 3.4 | 1.28E+05 | 4.22E+04 | 6.06E+06 | 3.70E+08 | 1.13E+07 |
| QHLS421 | 10243.1 | 5.3  | 3.2 | 5.14E+05 | 1.30E+05 | 2.48E+07 | 2.17E+08 | 5.60E+06 |
| QHLS423 | 10319.2 | 5.1  | 2.9 | 1.90E+05 | 4.01E+04 | 9.34E+06 | 4.98E+08 | 3.50E+07 |
| QHLS425 | 10395.8 | 5.5  | 3.1 | 7.88E+04 | 2.69E+04 | 3.95E+06 | 4.43E+07 | 7.12E+06 |
| QHLS427 | 10473.0 | 5.5  | 3.0 | 5.56E+05 | 3.60E+04 | 2.84E+07 | 8.19E+07 | 1.11E+07 |
| QHLS429 | 10550.8 | 5.5  | 3.7 | 5.75E+05 | 2.93E+04 | 2.99E+07 | 5.24E+08 | 9.82E+06 |
| QHLS431 | 10629.2 | nm   | 3.8 | 1.69E+05 | 6.56E+04 | 8.95E+06 | 5.57E+08 | 2.21E+06 |
| QHLS433 | 10708.1 | nm   | 2.1 | 4.67E+05 | 6.25E+03 | 2.52E+07 | 9.92E+07 | 2.25E+06 |
| QHLS435 | 10787.7 | 9.0  | 1.8 | no dna   | no dna   | no dna   | no dna   | no dna   |
| QHLS439 | 10948.5 | 9.6  | 3.1 | 1.89E+06 | 2.76E+05 | 1.08E+08 | 1.59E+08 | 7.94E+07 |
| QHLS443 | 11111.8 | 9.0  | 1.5 | no dna   | no dna   | no dna   | no dna   | no dna   |
| QHLS447 | 11277.4 | 10.5 | nm  | no dna   | no dna   | no dna   | no dna   | no dna   |
| QHLS451 | 11445.6 | nm   | 1.7 | 1.68E+06 | 3.90E+05 | 1.07E+08 | 1.21E+08 | 4.53E+07 |
| QHLS453 | 11530.6 | 6.8  | 3.4 | no dna   | no dna   | no dna   | no dna   | no dna   |
| QHLS455 | 11616.2 | 5.9  | 1.9 | 4.15E+06 | 1.10E+06 | 2.74E+08 | 6.59E+07 | 8.59E+06 |
| QHLS457 | 11702.5 | 6.1  | 1.3 | no dna   | no dna   | no dna   | no dna   | no dna   |
| QHLS459 | 11789.4 | 5.2  | 1.9 | 1.08E+06 | 7.12E+04 | 7.39E+07 | 1.21E+08 | 1.60E+07 |
| QHLS461 | 11877.0 | 5.7  | 1.8 | no dna   | no dna   | no dna   | no dna   | no dna   |
| QHLS463 | 11965.2 | 4.9  | 1.9 | 6.11E+05 | 5.29E+04 | 4.35E+07 | 1.55E+08 | 8.31E+07 |
| QHLS465 | 12054.1 | 5.1  | 0.7 | no dna   | no dna   | no dna   | no dna   | no dna   |
| QHLS467 | 12143.6 | 5.4  | 1.6 | 2.38E+06 | 4.10E+05 | 1.76E+08 | 2.37E+08 | 5.57E+07 |
| QHLS469 | 12233.8 | 5.6  | nm  | no dna   | no dna   | no dna   | no dna   | no dna   |
| QHLS471 | 12324.7 | nm   | 1.9 | 8.00E+04 | 3.20E+04 | 6.12E+06 | 4.49E+08 | 8.53E+06 |
| QHLS473 | 12416.2 | 4.7  | 1.8 | 3.90E+05 | 1.56E+04 | 3.04E+07 | 7.39E+07 | 3.28E+07 |
| QHLS475 | 12508.4 | 4.7  | 1.6 | 3.80E+04 | 2.32E+02 | 3.02E+06 | 4.98E+08 | 4.95E+07 |

|         |         |     |     |          |          |          |          |          |
|---------|---------|-----|-----|----------|----------|----------|----------|----------|
| QHLS477 | 12601.3 | 4.7 | 1.9 | 5.63E+04 | 4.03E+04 | 4.55E+06 | 5.22E+08 | 8.28E+05 |
| QHLS479 | 12694.9 | 4.2 | nm  | 2.58E+05 | 8.02E+04 | 2.13E+07 | 4.34E+07 | 1.07E+06 |
| QHLS481 | 12789.2 | 4.6 | 1.3 | 5.77E+04 | 1.34E+04 | 4.85E+06 | 3.50E+08 | 1.00E+07 |
| QHLS483 | 12884.2 | 4.4 | 2.3 | 1.97E+05 | 6.44E+04 | 1.69E+07 | 3.45E+07 | 3.64E+06 |
| QHLS485 | 12979.9 | nm  | nm  | 1.93E+05 | 8.97E+04 | 1.68E+07 | 5.82E+07 | 1.63E+07 |
| QHLS487 | 13076.3 | 4.5 | 2.2 | 5.71E+04 | 1.84E+04 | 5.07E+06 | 3.95E+07 | 1.15E+06 |
| QHLS489 | 13173.5 | 4.1 | nm  | no dna   | no dna   | no dna   | no dna   | no dna   |
| QHLS491 | 13271.3 | 4.1 | 1.8 | no dna   | no dna   | no dna   | no dna   | no dna   |
| QHLS493 | 13369.9 | 4.3 | nm  | 4.48E+04 | 1.79E+04 | 4.20E+06 | 4.12E+08 | 8.72E+06 |
| QHLS495 | 13469.2 | 4.3 | 2.0 | 5.60E+04 | 8.77E+03 | 5.35E+06 | 4.80E+08 | 9.62E+06 |
| QHLS497 | 13569.2 | 4.4 | 1.7 | 1.36E+05 | 9.31E+04 | 1.32E+07 | 4.47E+07 | 1.39E+07 |
| QHLS499 | 13670.0 | 4.1 | 2.2 | 2.16E+05 | 7.09E+04 | 2.14E+07 | 3.22E+07 | 7.05E+06 |
| QHLS501 | 13771.5 | 4.1 | 1.5 | 1.30E+05 | 4.02E+04 | 1.31E+07 | 5.32E+07 | 2.13E+05 |
| QHLS503 | 13873.8 | 4.1 | nm  | 4.24E+04 | 1.34E+04 | 4.36E+06 | 5.15E+08 | 1.16E+07 |
| QHLS505 | 13976.9 | nm  | 1.2 | 9.44E+04 | 9.03E+03 | 9.88E+06 | 3.47E+08 | 2.03E+07 |
| QHLS507 | 14080.7 | 3.9 | 1.9 | 3.20E+05 | 7.13E+04 | 3.42E+07 | 4.66E+07 | 4.12E+06 |
| QHLS509 | 14185.3 | 3.9 | 1.9 | 1.76E+05 | 4.89E+04 | 1.91E+07 | 4.29E+07 | 2.08E+06 |
| QHLS511 | 14290.6 | 3.7 | 1.7 | 3.16E+04 | 8.32E+03 | 3.50E+06 | 3.09E+08 | 1.52E+07 |
| QHLS513 | 14396.8 | 3.8 | nm  | 9.39E+04 | 2.51E+04 | 1.06E+07 | 2.50E+08 | 1.22E+07 |
| QHLS515 | 14503.7 | 3.7 | nm  | 2.31E+04 | 1.16E+03 | 2.65E+06 | 1.91E+08 | 1.13E+07 |
| QHLS517 | 14611.4 | 3.4 | 1.7 | no dna   | no dna   | no dna   | no dna   | no dna   |
| QHLS519 | 14720.0 | 3.2 | 2.1 | 7.31E+04 | 3.90E+04 | 8.70E+06 | 1.81E+07 | 7.94E+05 |
| QHLS521 | 14829.3 | 3.6 | 1.8 | 7.31E+04 | 3.90E+04 | 8.87E+06 | 1.81E+07 | 7.94E+05 |
| QHLS523 | 14939.4 | 3.3 | 1.8 | 6.33E+04 | 2.00E+04 | 7.82E+06 | 3.26E+07 | 1.23E+07 |
| QHLS525 | 15050.4 | 3.3 | 1.8 | 1.25E+05 | 7.63E+04 | 1.57E+07 | 2.04E+07 | 2.61E+06 |
| QHLS527 | 15162.2 | 3.5 | 1.0 | 1.35E+05 | 6.80E+03 | 1.73E+07 | 2.38E+08 | 2.14E+07 |
| QHLS529 | 15274.8 | 3.2 | 1.9 | 5.08E+05 | 2.15E+05 | 6.63E+07 | 2.31E+07 | 2.47E+05 |
| QHLS531 | 15388.2 | 2.6 | 1.8 | 4.57E+05 | 2.59E+05 | 6.08E+07 | 2.65E+07 | 7.39E+06 |
| QHLS533 | 15502.5 | 3.2 | nm  | 1.49E+05 | 6.71E+04 | 2.02E+07 | 3.91E+08 | 2.86E+07 |
| QHLS535 | 15617.7 | nm  | 1.8 | 1.06E+05 | 2.37E+04 | 1.46E+07 | 1.86E+08 | 3.69E+07 |

|         |         |     |     |          |          |          |          |          |
|---------|---------|-----|-----|----------|----------|----------|----------|----------|
| QHLS537 | 15733.7 | 3.1 | 1.7 | 7.68E+05 | 5.89E+04 | 1.08E+08 | 4.17E+07 | 9.83E+06 |
| QHLS539 | 15850.5 | 3.1 | 1.0 | 1.66E+05 | 8.06E+03 | 2.37E+07 | 2.33E+08 | 7.54E+06 |
| QHLS541 | 15968.3 | 3.5 | 1.5 | 1.62E+06 | 1.75E+05 | 2.36E+08 | 3.79E+07 | 1.46E+07 |
| QHLS543 | 16086.9 | 3.5 | 1.7 | no dna   | no dna   | no dna   | no dna   | no dna   |
| QHLS545 | 16206.4 | 3.2 | 1.8 | 7.48E+05 | 9.75E+04 | 1.13E+08 | 1.69E+07 | 4.96E+06 |
| QHLS547 | 16326.7 | 3.0 | 0.4 | no dna   | no dna   | no dna   | no dna   | no dna   |
| QHLS549 | 16448.0 | 3.2 | 1.7 | 1.53E+06 | 2.17E+05 | 2.40E+08 | 2.45E+07 | 2.05E+06 |
| QHLS551 | 16570.2 | 3.1 | 0.1 | no dna   | no dna   | no dna   | no dna   | no dna   |
| QHLS553 | 16693.2 | 3.0 | 1.9 | 2.36E+06 | 1.96E+05 | 3.85E+08 | 1.87E+07 | 3.80E+06 |
| QHLS555 | 16817.2 | 2.9 | 1.6 | 8.89E+05 | 2.43E+03 | 1.48E+08 | 1.36E+07 | 2.45E+06 |
| QHLS557 | 16942.1 | 3.1 | 0.1 | no dna   | no dna   | no dna   | no dna   | no dna   |
| QHLS559 | 17068.0 | 2.9 | 2.0 | 4.65E+05 | 2.24E+05 | 8.01E+07 | 1.74E+07 | 7.04E+06 |
| QHLS561 | 17194.7 | 3.0 | 0.3 | no dna   | no dna   | no dna   | no dna   | no dna   |
| QHLS563 | 17322.5 | 3.2 | 1.5 | 6.03E+05 | 1.86E+04 | 1.08E+08 | 1.37E+07 | 1.45E+06 |
| QHLS565 | 17451.1 | 3.0 | 0.5 | no dna   | no dna   | no dna   | no dna   | no dna   |
| QHLS567 | 17580.7 | 2.9 | 1.7 | 2.39E+05 | 1.51E+04 | 4.42E+07 | 1.02E+08 | 2.25E+07 |
| QHLS569 | 17711.3 | 3.2 | 0.9 | 4.11E+04 | 2.43E+04 | 7.77E+06 | 7.58E+08 | 3.33E+07 |
| QHLS571 | 17842.9 | 3.6 | 1.3 | 9.47E+05 | 9.71E+04 | 1.82E+08 | 4.80E+07 | 6.84E+04 |
| QHLS573 | 17975.4 | nm  | 1.2 | 1.03E+06 | 2.56E+05 | 2.02E+08 | 4.54E+07 | 3.63E+05 |
| QHLS575 | 18108.9 | nm  | nm  | no dna   | no dna   | no dna   | no dna   | no dna   |
| QHLS577 | 18243.4 | 8.1 | 1.4 | 3.78E+04 | 8.26E+03 | 7.69E+06 | 3.52E+07 | 4.02E+06 |
| QHLS579 | 18378.9 | nm  | 0.5 | 2.19E+04 | 1.70E+03 | 4.53E+06 | 3.34E+08 | 1.31E+07 |



**Table S2 Ecological estimates of amoA gene libraries from the Qinghai Lake sediments**

| Libraries | Clones | Observed OTUs | Coverage | Simpson | Shannon | Evenness | Chao 1 |
|-----------|--------|---------------|----------|---------|---------|----------|--------|
| QHLS007   | 22     | 4             | 95%      | 0.6     | 1.1     | 0.8      | 4.0    |
| QHLS015   | 22     | 3             | 100%     | 0.6     | 1.0     | 0.9      | 3.0    |
| QHLS029   | 21     | 3             | 95%      | 0.5     | 0.8     | 0.7      | 3.0    |
| QHLS031   | 24     | 4             | 100%     | 0.5     | 0.9     | 0.6      | 4.0    |
| QHLS043   | 21     | 3             | 100%     | 0.6     | 1.0     | 0.9      | 3.0    |
| QHLS053   | 23     | 4             | 100%     | 0.6     | 1.2     | 0.8      | 4.0    |
| QHLS063   | 24     | 4             | 100%     | 0.7     | 1.3     | 0.9      | 4.0    |
| QHLS073   | 23     | 2             | 100%     | 0.5     | 0.6     | 1.0      | 2.0    |
| QHLS087   | 23     | 3             | 100%     | 0.5     | 0.8     | 0.8      | 3.0    |
| QHLS101   | 25     | 4             | 96%      | 0.6     | 1.0     | 0.7      | 4.0    |
| QHLS115   | 23     | 5             | 87%      | 0.5     | 1.0     | 0.6      | 8.0    |
| QHLS129   | 19     | 3             | 100%     | 0.5     | 0.9     | 0.8      | 3.0    |
| QHLS147   | 22     | 4             | 91%      | 0.6     | 1.0     | 0.7      | 5.0    |
| QHLS151   | 22     | 5             | 95%      | 0.6     | 1.2     | 0.7      | 5.0    |
| QHLS157   | 22     | 5             | 91%      | 0.7     | 1.3     | 0.7      | 6.0    |
| QHLS161   | 22     | 3             | 95%      | 0.5     | 0.8     | 0.8      | 3.0    |
| QHLS169   | 24     | 3             | 100%     | 0.5     | 0.8     | 0.8      | 3.0    |
| QHLS181   | 23     | 2             | 100%     | 0.2     | 0.3     | 0.7      | 2.0    |
| QHLS187   | 22     | 3             | 100%     | 0.6     | 1.0     | 0.9      | 3.0    |
| QHLS191   | 24     | 4             | 96%      | 0.5     | 1.0     | 0.7      | 4.0    |
| QHLS203   | 22     | 3             | 100%     | 0.6     | 1.0     | 0.9      | 3.0    |
| QHLS221   | 23     | 3             | 96%      | 0.5     | 0.8     | 0.7      | 3.0    |
| QHLS223   | 22     | 2             | 100%     | 0.5     | 0.7     | 1.0      | 2.0    |
| QHLS231   | 22     | 2             | 100%     | 0.5     | 0.7     | 1.0      | 2.0    |
| QHLS237   | 24     | 2             | 100%     | 0.5     | 0.7     | 1.0      | 2.0    |
| QHLS243   | 24     | 2             | 100%     | 0.3     | 0.5     | 0.8      | 2.0    |
| QHLS257   | 20     | 1             | 100%     | 0.0     | 0.0     | 1.0      | 1.0    |
| QHLS269   | 22     | 3             | 100%     | 0.7     | 1.1     | 1.0      | 3.0    |
| QHLS283   | 22     | 3             | 100%     | 0.6     | 1.0     | 0.9      | 3.0    |
| QHLS291   | 10     | 2             | 100%     | 0.5     | 0.7     | 1.0      | 2.0    |
| QHLS299   | 14     | 2             | 100%     | 0.2     | 0.4     | 0.8      | 2.0    |
| QHLS311   | 22     | 2             | 100%     | 0.4     | 0.6     | 0.9      | 2.0    |
| QHLS319   | 17     | 2             | 100%     | 0.3     | 0.5     | 0.8      | 2.0    |
| QHLS329   | 23     | 3             | 100%     | 0.4     | 0.7     | 0.7      | 3.0    |
| QHLS339   | 21     | 2             | 100%     | 0.3     | 0.5     | 0.8      | 2.0    |
| QHLS349   | 20     | 3             | 100%     | 0.5     | 0.9     | 0.8      | 3.0    |
| QHLS363   | 24     | 3             | 96%      | 0.2     | 0.3     | 0.5      | 4.0    |
| QHLS371   | 24     | 2             | 100%     | 0.2     | 0.3     | 0.7      | 2.0    |
| QHLS377   | 16     | 1             | 100%     | 0.0     | 0.0     | 1.0      | 1.0    |
| QHLS381   | 23     | 2             | 100%     | 0.5     | 0.7     | 1.0      | 2.0    |
| QHLS389   | 24     | 1             | 100%     | 0.0     | 0.0     | 1.0      | 1.0    |
| QHLS399   | 24     | 2             | 100%     | 0.5     | 0.7     | 1.0      | 2.0    |
| QHLS415   | 23     | 2             | 96%      | 0.1     | 0.2     | 0.6      | 2.0    |
| QHLS427   | 24     | 3             | 100%     | 0.6     | 0.9     | 0.8      | 3.0    |
| QHLS439   | 22     | 2             | 100%     | 0.5     | 0.7     | 1.0      | 2.0    |
| QHLS455   | 24     | 3             | 96%      | 0.5     | 0.8     | 0.7      | 3.0    |
| QHLS463   | 23     | 4             | 91%      | 0.5     | 0.9     | 0.6      | 5.0    |
| QHLS477   | 16     | 2             | 100%     | 0.3     | 0.5     | 0.8      | 2.0    |
| QHLS491   | 21     | 1             | 100%     | 0.0     | 0.0     | 1.0      | 1.0    |
| QHLS501   | 22     | 1             | 100%     | 0.0     | 0.0     | 1.0      | 1.0    |
| QHLS525   | 24     | 1             | 100%     | 0.0     | 0.0     | 1.0      | 1.0    |
| QHLS537   | 24     | 2             | 100%     | 0.4     | 0.6     | 0.9      | 2.0    |

|         |    |   |      |     |     |     |     |
|---------|----|---|------|-----|-----|-----|-----|
| QHLS553 | 24 | 2 | 100% | 0.3 | 0.5 | 0.8 | 2.0 |
| QHLS567 | 24 | 1 | 100% | 0.0 | 0.0 | 1.0 | 1.0 |
| QHLS573 | 24 | 2 | 100% | 0.2 | 0.3 | 0.7 | 2.0 |
| QHLS577 | 24 | 1 | 100% | 0.0 | 0.0 | 1.0 | 1.0 |

---
